# Supplementary material
Source: PubMed Central journal article supplement (PMC5710588)

## Supplementary Online Content

Giustino G, Harari R, Baber U, et al. Long-term safety and efficacy of new-generation drug-eluting stents in women with acute myocardial infarction: from the Women in Innovation and Drug-Eluting Stents (WIN-DES) Collaboration. *JAMA Cardiol*. Published online June 28, 2017. doi:10.1001/jamacardio.2017.1978

**eTable 1.** Characteristics of Included Randomized Controlled Trials.

**eTable 2.** Clinical Endpoint Definitions Used Across Randomized Controlled Trials.

**eTable 3.** Baseline Clinical and Angiographic Characteristics.

### **eReferences**

**eFigure.** Kaplan-Meier curves for death, myocardial infarction or target lesion revascularization (1A), death, myocardial infarction or stent thrombosis (1B), definite or probable stent thrombosis (1C) and target lesion revascularization (1D) in women presenting with unstable angina, non-ST-elevation myocardial infarction or ST-elevation myocardial infarction.

This supplementary material has been provided by the authors to give readers additional information about their work.

**eTable 1.** Characteristics of Included Randomized Controlled Trials.

| <b>Study</b>               | <b>Year</b> | <b>Patients</b> | <b>Women</b> | <b>Stents used</b> | <b>Key inclusion criteria</b>           | <b>Recommended DAPT Duration</b> |
|----------------------------|-------------|-----------------|--------------|--------------------|-----------------------------------------|----------------------------------|
| RAVEL <sup>1</sup>         | 2002        | 238             | 58 (24)      | Cypher, BMS        | Stable CAD or UA, single de-novo lesion | 2 months                         |
| SIRIUS <sup>2</sup>        | 2003        | 1058            | 305 (29%)    | Cypher, BMS        | Stable CAD or UA, single de-novo lesion | 3 months                         |
| E-SIRIUS <sup>3</sup>      | 2003        | 352             | 103 (29%)    | Cypher, BMS        | Stable CAD or UA, single de-novo lesion | 2 months                         |
| C-SIRIUS <sup>4</sup>      | 2004        | 100             | 31 (31%)     | Cypher, BMS        | Stable CAD or UA, single de-novo lesion | 3 months                         |
| TAXUS I <sup>5</sup>       | 2003        | 61              | 7 (11%)      | Taxus, BMS         | Stable CAD or UA, single lesion         | 6 months                         |
| TAXUS II SR <sup>6</sup>   | 2003        | 267             | 67 (25%)     | Taxus, BMS         | Stable CAD or UA, single de-novo lesion | 6 months                         |
| TAXUS IV <sup>7</sup>      | 2004        | 1314            | 367 (28%)    | Taxus, BMS         | Stable CAD or UA, single de-novo lesion | 6 months                         |
| TAXUS V <sup>8</sup>       | 2005        | 1156            | 353 (31%)    | Taxus, BMS         | Stable CAD or UA, single de-novo lesion | 6 months                         |
| SIRTAX <sup>9</sup>        | 2005        | 1012            | 231 (23%)    | Cypher, Taxus      | Stable CAD or UA, single de-novo lesion | 12 months                        |
| ENDEAVOR II <sup>10</sup>  | 2006        | 1197            | 283 (24%)    | Endeavor, BMS      | Stable CAD or UA, single de-novo lesion | 3 months                         |
| ENDEAVOR III <sup>11</sup> | 2006        | 436             | 133 (31%)    | Endeavor, Cypher   | Stable CAD or UA, single                | 3 months                         |

|                            |      |      |            |                           |                                                                   |                 |
|----------------------------|------|------|------------|---------------------------|-------------------------------------------------------------------|-----------------|
| ENDEAVOR IV <sup>12</sup>  | 2010 | 1548 | 500 (32%)  | Endeavor, Taxus           | de-novo lesion<br>Stable CAD or UA, single<br>de-novo lesion      | 6 months        |
| PROTECT <sup>13</sup>      | 2012 | 8709 | 2061 (24%) | Endeavor, Cypher          | Stable CAD or UA, single<br>de-novo lesion                        | 12 months       |
| RESOLUTE AC <sup>14</sup>  | 2010 | 2292 | 529 (23%)  | Resolute, Xience          | Stable CAD, UA, NSTEMI<br>or STEMI                                | 6 months        |
| TWENTE <sup>15</sup>       | 2012 | 1391 | 382 (27%)  | Resolute, Xience          | Stable CAD, UA or NSTEMI                                          | 12 months       |
| SPIRIT II <sup>16</sup>    | 2006 | 300  | 80 (27%)   | Xience, Taxus             | Stable CAD, UA or 2 de-<br>novo lesions                           | 6 months        |
| SPIRIT III <sup>17</sup>   | 2008 | 1002 | 314 (31)   | Xience, Taxus             | Stable CAD, UA or 2 de-<br>novo lesions                           | 6 months        |
| SPIRIT IV <sup>18</sup>    | 2010 | 3687 | 1189 (32)  | Xience, Taxus             | Stable CAD, UA or 3 de-<br>novo lesions                           | 12 months       |
| COMPARE I <sup>19</sup>    | 2010 | 1800 | 526 (29%)  | Xience, Taxus             | Stable CAD, UA, NSTEMI<br>or STEMI                                | 12 months       |
| BASKET-PROVE <sup>20</sup> | 2010 | 2314 | 565 (24%)  | Xience, Cypher, BMS       | Stable CAD, UA or acute<br>MI, target vessel diameter ≥<br>3.0 mm | 12 months       |
| EXCELLENT <sup>21</sup>    | 2011 | 1443 | 512 (35%)  | Xience, Promus,<br>Cypher | Stable CAD, UA, NSTEMI                                            | 6 or 12 months* |
| RESET <sup>22</sup>        | 2012 | 3197 | 742 (23%)  | Xience, Cypher            | Stable CAD, UA, NSTEMI<br>or STEMI                                | 3 or 12 months* |
| PRODIGY <sup>23</sup>      | 2012 | 2013 | 473 (23%)  | Xience, Promus,           | Stable CAD, UA, NSTEMI                                            | 6 or 24 months* |

|                           |      |      |           |                                           |                                    |           |
|---------------------------|------|------|-----------|-------------------------------------------|------------------------------------|-----------|
| LEADERS <sup>24</sup>     | 2008 | 1707 | 430 (25%) | Endeavor, Taxus, BMS<br>Biomatrix, Cypher | Stable CAD, UA, NSTEMI<br>or STEMI | 12 months |
| COMPARE II <sup>25</sup>  | 2013 | 2707 | 293 (26%) | Nobori, Xience, Promus                    | Stable CAD, UA, NSTEMI<br>or STEMI | 12 months |
| ISAR-TEST 4 <sup>26</sup> | 2009 | 2603 | 623 (24%) | Yukon, Xience, Cypher                     | Stable CAD, UA, NSTEMI<br>or STEMI | 6 months  |

CAD: Coronary Artery Disease; BMS: Bare Metal Stent; NSTEMI: Non-ST segment Elevation Myocardial Infarction; STEMI: ST segment Elevation Myocardial Infarction; UA: Unstable Angina. Cypher and Cordis, Johnson & Johnson, Miami Lakes, FL, USA; Taxus, Boston Scientific, Natick, MA, USA; Xience, Abbott Vascular, Santa Clara, CA, USA; Promus, Boston Scientific; Endeavor, Medtronic, Santa Rosa, CA, USA; Resolute, Medtronic; Biomatrix, Biosensors, Newport Beach, CA, USA; Nobori, Terumo, Tokyo, Japan; Yukon, Translumina, Hechingen, Germany. \*Patients were randomized to different DAPT durations.

**eTable 2.** Clinical Endpoint Definitions Used Across Randomized Controlled Trials.

| <b>Trial name</b> | <b>Myocardial infarction definition</b>                                                                                                                                              | <b>Myocardial infarction definition (old or new)</b> | <b>Target lesion revascularization definition</b>                                                                                                           | <b>Stent thrombosis definition</b> |
|-------------------|--------------------------------------------------------------------------------------------------------------------------------------------------------------------------------------|------------------------------------------------------|-------------------------------------------------------------------------------------------------------------------------------------------------------------|------------------------------------|
| RAVEL             | Development of Q waves in $\geq 2$ contiguous leads with elevated cardiac enzymes or, in the absence of Q waves, increase in the CK level $\geq 2$ *ULN and increased level of CK-MB | Old                                                  | Revascularization for ischemia for a stenosis of the luminal diameter anywhere within the stent or within the 5-mm borders proximal or distal to the stent. | ARC criteria                       |
| SIRIUS            | Development of Q waves in $\geq 2$ contiguous leads with elevated cardiac enzymes or, in the absence of Q waves, increase in the CK level $\geq 2$ *ULN and increased level of CK-MB | Old                                                  | Revascularization for ischemia for a stenosis of the luminal diameter anywhere within the stent or within the 5-mm borders proximal or distal to the stent. | ARC criteria                       |
| E-SIRIUS          | Development of Q waves in $\geq 2$ contiguous leads with elevated cardiac enzymes or, in the absence of Q waves, increase in the CK level $\geq 2$ *ULN and increased level of CK-MB | Old                                                  | Revascularization for ischemia for a stenosis of the luminal diameter anywhere within the stent or within the 5-mm borders proximal or distal to the stent. | ARC criteria                       |
| C-SIRIUS          | Development of Q waves in $\geq 2$ contiguous leads with elevated cardiac enzymes or, in the absence of Q waves, increase in the CK level $\geq 2$ *ULN and increased level of CK-MB | Old                                                  | Revascularization for ischemia for a stenosis of the luminal diameter anywhere within the stent or within the 5-mm borders proximal or distal to the stent. | ARC criteria                       |

|             |                                                                                                                                                        |     |                                                                                                                                                             |              |
|-------------|--------------------------------------------------------------------------------------------------------------------------------------------------------|-----|-------------------------------------------------------------------------------------------------------------------------------------------------------------|--------------|
| TAXUS I     | Development of Q waves in $\geq 2$ contiguous leads with CK and CK-MB levels elevated above normal                                                     | Old | Revascularization for ischemia for a stenosis of the luminal diameter anywhere within the stent or within the 5-mm borders proximal or distal to the stent. | ARC criteria |
| TAXUS II SR | Development of Q waves in $\geq 2$ contiguous leads or, in the absence of Q waves, increase in the CK level $\geq 2$ *ULN and increased level of CK-MB | Old | Revascularization for ischemia for a stenosis of the luminal diameter anywhere within the stent or within the 5-mm borders proximal or distal to the stent. | ARC criteria |
| TAXUS IV    | Development of Q waves in $\geq 2$ contiguous leads or, in the absence of Q waves, increase in the CK level $\geq 2$ *ULN and increased level of CK-MB | Old | Revascularization for ischemia for a stenosis of the luminal diameter anywhere within the stent or within the 5-mm borders proximal or distal to the stent. | ARC criteria |
| TAXUS V     | Development of Q waves in $\geq 2$ contiguous leads or, in the absence of Q waves, increase in the CK level $\geq 2$ *ULN and increased level of CK-MB | Old | Revascularization for ischemia for a stenosis of the luminal diameter anywhere within the stent or within the 5-mm borders proximal or distal to the stent  | ARC criteria |
| SIRTAX      | Development of Q waves in $\geq 2$ contiguous leads or, in the absence of Q waves, increase in the CK level $\geq 2$ *ULN and increased level of CK-MB | Old | Revascularization for ischemia for a stenosis of the luminal diameter anywhere within the stent or within the 5-mm borders proximal or                      | ARC criteria |

|              |                                                                                                                                                                                                                                                                          |     |                                                                                                                                                            |                              |
|--------------|--------------------------------------------------------------------------------------------------------------------------------------------------------------------------------------------------------------------------------------------------------------------------|-----|------------------------------------------------------------------------------------------------------------------------------------------------------------|------------------------------|
|              | or troponin I                                                                                                                                                                                                                                                            |     | distal to the stent                                                                                                                                        |                              |
| ENDEAVOR II  | Development of Q waves in $\geq 2$ contiguous leads or, in the absence of Q waves, increase in the CK level $\geq 2$ *ULN and increased level of CK-MB                                                                                                                   | Old | Revascularization for ischemia for a stenosis of the luminal diameter anywhere within the stent or within the 5-mm borders proximal or distal to the stent | ARC criteria                 |
| ENDEAVOR III | Development of Q waves in $\geq 2$ contiguous leads with elevated cardiac enzymes or, in the absence of Q waves, increase in the CK level $\geq 2$ *ULN and increased level of CK-MB                                                                                     | Old | Revascularization for ischemia for a stenosis of the luminal diameter anywhere within the stent or within the 5-mm borders proximal or distal to the stent | ARC criteria                 |
| ENDEAVOR IV  | Development of Q waves in $\geq 2$ contiguous leads with elevated cardiac enzymes or, in the absence of Q waves, increase in the CK level $\geq 2$ *ULN and increased level of CK-MB                                                                                     | Old | Revascularization for ischemia for a stenosis of the luminal diameter anywhere within the stent or within the 5-mm borders proximal or distal to the stent | ARC criteria                 |
| PROTECT      | II Universal Definition (Thygesen K et al. Circulation 2007): Peri-procedural MI: cardiac biomarkers increase $\geq 3$ *ULN Spontaneous: Typical rise and fall of cardiac biomarkers (preferably troponin) with at least 1 value $>URL$ and at least 1 of the following: | New | Revascularization for ischemia for a stenosis of the luminal diameter anywhere within the stent or within the 5-mm borders proximal or distal to the stent | ARC criteria<br>ARC criteria |

|             |                                                                                                                                                                                                                                                                                                                                                                                                                                                                                                                                                                |     |                                                                                                                                                                                |
|-------------|----------------------------------------------------------------------------------------------------------------------------------------------------------------------------------------------------------------------------------------------------------------------------------------------------------------------------------------------------------------------------------------------------------------------------------------------------------------------------------------------------------------------------------------------------------------|-----|--------------------------------------------------------------------------------------------------------------------------------------------------------------------------------|
|             | symptoms, ST-T changes at ECG, pathological Q waves, or imaging evidence of ischemia                                                                                                                                                                                                                                                                                                                                                                                                                                                                           |     |                                                                                                                                                                                |
| RESOLUTE AC | Extended historical definition (Vranckx et al. Eurointervention 2010). In summary: development of Q waves in $\geq 2$ contiguous leads and elevated cardiac enzymes or, in the absence of Q waves, increase in the CK level $\geq 2 \times \text{ULN}$ and increased level of CK-MB or troponin. In patients with acute MI at baseline: if cardiac biomarkers still raising new chest pain of ischemia equivalent and rise in cardiac biomarkers $> 50\%$ previous level; if cardiac biomarkers have returned to normal, CK level $\geq 2 \times \text{ULN}$ . | New | Revascularization for ischemia for a stenosis of the luminal diameter anywhere within the stent or within the 5-mm borders proximal or distal to the stent<br><br>ARC criteria |
| TWENTE      | Extended historical definition (Vranckx et al. Eurointervention 2010). In summary: development of Q waves in $\geq 2$ contiguous leads and elevated cardiac enzymes or, in the absence of Q waves, increase in the CK level $\geq 2 \times \text{ULN}$ and increased level of CK-MB                                                                                                                                                                                                                                                                            | New | Revascularization for ischemia for a stenosis of the luminal diameter anywhere within the stent or within the 5-mm borders proximal or distal to the stent<br><br>ARC criteria |



or troponin. In patients with acute MI at baseline: if cardiac biomarkers still raising new chest pain of ischemia equivalent and rise in cardiac biomarkers >50% previous level; if cardiac biomarkers have returned to normal, CK level  $\geq 2 \times$  ULN.

|            |                                                                                                                                                                                                                                                                                                     |     |                                                                                                                                                            |              |
|------------|-----------------------------------------------------------------------------------------------------------------------------------------------------------------------------------------------------------------------------------------------------------------------------------------------------|-----|------------------------------------------------------------------------------------------------------------------------------------------------------------|--------------|
| SPIRIT II  | Development of Q waves in $\geq 2$ contiguous leads or, in the absence of Q waves, a typical rise and fall of CK-MB (if non-procedural/spontaneous MI, CK-MB >2 times upper limit of normal; if post PCI, CK-MB >3 times upper limit of normal; if post CABG, CK-MB >5 times upper limit of normal) | New | Revascularization for ischemia for a stenosis of the luminal diameter anywhere within the stent or within the 5-mm borders proximal or distal to the stent | ARC criteria |
| SPIRIT III | Development of Q waves in $\geq 2$ contiguous leads with elevated cardiac enzymes or, in the absence of Q waves, increase in the CK level $\geq 2 \times$ ULN and increased level of CK-MB                                                                                                          | New | Revascularization for ischemia for a stenosis of the luminal diameter anywhere within the stent or within the 5-mm borders proximal or distal to the stent | ARC criteria |
| SPIRIT IV  | Development of Q waves in $\geq 2$ contiguous leads with elevated cardiac enzymes or, in the absence of Q waves, increase in the CK level                                                                                                                                                           | New | Revascularization for ischemia for a stenosis of the luminal diameter anywhere within the stent or within the 5-mm borders proximal or                     | ARC criteria |

|              |                                                                                                                                                                                                                                                                                                                                                                                                                             |     |                                                                                                                                                                                              |              |
|--------------|-----------------------------------------------------------------------------------------------------------------------------------------------------------------------------------------------------------------------------------------------------------------------------------------------------------------------------------------------------------------------------------------------------------------------------|-----|----------------------------------------------------------------------------------------------------------------------------------------------------------------------------------------------|--------------|
| COMPARE      | <p>≥2*ULN and increased level of CK-MB</p> <p>Periprocedural MI (in patients without acute MI at baseline): any elevation in concentrations of CK ≥2*ULN and increase in CK-MB or troponin.</p> <p>Spontaneous MI: typical rise and fall of troponin or CK-MB with at least one of the following: ischemic symptoms, development of pathological Q waves, ischemic ECG changes, or pathological findings of an acute MI</p> | New | <p>distal to the stent</p> <p>Revascularization for ischemia for a stenosis of the luminal diameter anywhere within the stent or within the 5-mm borders proximal or distal to the stent</p> | ARC criteria |
| BASKET-PROVE | <p>Typical rise and fall of cardiac biomarkers (preferably troponin) with at least 1 value &gt;URL and at least 1 of the following: symptoms, ST-T changes at ECG, pathological Q waves, or recent angioplasty.</p>                                                                                                                                                                                                         | New | <p>Target vessel Revascularization was used</p>                                                                                                                                              | ARC criteria |
| EXCELLENT    | <p>Academic Research Consortium criteria (Cutlip DE et al. Circulation 2007) In summary:</p> <p>Periprocedural MI: troponin &gt;3*URL or CK-MB&gt;3*URL if baseline cardiac biomarkers &lt;URL. Stable or decreasing values on 2 samples</p>                                                                                                                                                                                | New | <p>Revascularization for ischemia for a stenosis of the luminal diameter anywhere within the stent or within the 5-mm borders proximal or distal to the stent</p>                            | ARC criteria |

|         |                                                                                                                                                                                                                                                                                                                                                                  |     |                                                                                                                                                            |                              |
|---------|------------------------------------------------------------------------------------------------------------------------------------------------------------------------------------------------------------------------------------------------------------------------------------------------------------------------------------------------------------------|-----|------------------------------------------------------------------------------------------------------------------------------------------------------------|------------------------------|
|         | followed by 20% increase if baseline cardiac biomarkers >URL.<br>Spontaneous MI: troponin >URL or CK-MB >URL                                                                                                                                                                                                                                                     |     |                                                                                                                                                            |                              |
| RESET   | Periprocedural MI: CK-MB $\geq 3 \times$ ULN or CK $\geq 3 \times$ ULN in the absence of CKMB measurement.<br>Spontaneous MI: Academic Research Consortium criteria (Cutlip DE et al. Circulation 2007), troponin >URL or CK-MB >URL                                                                                                                             | New | Revascularisation for ischemia for a stenosis of the luminal diameter anywhere within the stent or within the 5-mm borders proximal or distal to the stent | ARC criteria                 |
| PRODIGY | II Universal Definition (Thygesen K et al. Circulation 2007): Periprocedural MI: cardiac biomarkers increase $\geq 3 \times$ ULN Spontaneous: Typical rise and fall of cardiac biomarkers (preferably troponin) with at least 1 value >URL and at least 1 of the following: symptoms, ST-T changes at ECG, pathological Q waves, or imaging evidence of ischemia | New | Target vessel Revascularisation was used                                                                                                                   | ARC criteria<br>ARC criteria |
| LEADERS | Development of Q waves in $\geq 2$ contiguous leads or, in the absence of                                                                                                                                                                                                                                                                                        | New | Revascularization for ischemia for a stenosis of the luminal diameter                                                                                      | ARC criteria                 |

|             |                                                                                                                                                                                                                                                                                                                                                                                                                                                                                                                                                                                                                                                                                |     |                                                                                                                                                                                                                                                               |              |
|-------------|--------------------------------------------------------------------------------------------------------------------------------------------------------------------------------------------------------------------------------------------------------------------------------------------------------------------------------------------------------------------------------------------------------------------------------------------------------------------------------------------------------------------------------------------------------------------------------------------------------------------------------------------------------------------------------|-----|---------------------------------------------------------------------------------------------------------------------------------------------------------------------------------------------------------------------------------------------------------------|--------------|
| COMPARE-2   | <p>Q waves, increase in the CK level <math>\geq 2 \times</math>ULN and increased level of CK-MB or troponin I</p> <p>Periprocedural MI (in patients without acute MI at baseline): any elevation in concentrations of CK <math>\geq 2 \times</math>ULN and increase in CK-MB or troponin.</p>                                                                                                                                                                                                                                                                                                                                                                                  | New | <p>anywhere within the stent or within the 5-mm borders proximal or distal to the stent</p> <p>Revascularization for ischemia for a stenosis of the luminal diameter anywhere within the stent or within the 5-mm borders proximal or distal to the stent</p> | ARC criteria |
| ISAR-TEST 4 | <p>Spontaneous MI: typical rise and fall of troponin or CK-MB with at least one of the following: ischemic symptoms, development of pathological Q waves, ischemic ECG changes, or pathological findings of an acute MI</p> <p>Periprocedural MI: CK-MB (or CK) <math>\geq 3 \times</math>ULN and at least 50% over the most recent pre-PCI levels, or the development of new ECG changes consistent with MI and CK-MB (CK) elevation <math>&gt;</math>ULN at 2 measurements for patients with stable angina pectoris or NSTEMI-ACS and falling or normal CK-MB (CK) levels. Recurrent chest pain lasting .30 min with either new ECG changes consistent with second MI or</p> | New | <p>Revascularization for ischemia for a stenosis of the luminal diameter anywhere within the stent or within the 5-mm borders proximal or distal to the stent</p>                                                                                             | ARC criteria |

next CK-MB (CK) level at least 8–12 h after PCI elevated at least 50% above the previous level was considered procedure-related MI for patients presenting with elevated CK-MB (CK) level prior to PCI. Spontaneous MI: any CK-MB increase with or without the development of Q-waves on ECG.

---

ARC: Academic Research Consortium; CK: Creatine-Kinase; ECG = Electrocardiogram; MI: Myocardial Infarction; URL: Upper Reference Limit.

**eTable 3.** Baseline Clinical and Angiographic Characteristics.

|                          | <b>Overall<br/>(N=4373)</b> | <b>UA<br/>(N=2197)</b> | <b>NSTEMI<br/>(N=1397)</b> | <b>STEMI<br/>(N=779)</b> | <b>P-value</b> |
|--------------------------|-----------------------------|------------------------|----------------------------|--------------------------|----------------|
| Age (Years)              | 66.81 ± 11.28               | 67.01 ± 10.89          | 66.49 ± 11.27              | 66.82 ± 12.34            | 0.42           |
| BMI (kg/m <sup>2</sup> ) | 27.47 ± 5.45                | 27.81 ± 5.66           | 27.44 ± 5.28               | 26.47 ± 5.01             | <0.0001        |
| Risk factors             |                             |                        |                            |                          |                |
| Diabetes mellitus        | 1229 (28.1%)                | 712 (32.4%)            | 377 (27.0%)                | 140 (18.0%)              | <0.0001        |
| IDDM                     | 386 (31.4%)                 | 211 (29.6%)            | 139 (36.9%)                | 36 (25.7%)               | 0.02           |
| Hypertension             | 3067 (70.1%)                | 1695 (77.2%)           | 942 (67.4%)                | 430 (55.2%)              | <0.0001        |
| Hypercholesterolemia     | 2638 (60.3%)                | 1519 (69.1%)           | 802 (57.4%)                | 317 (40.7%)              | <0.0001        |
| Serum creatinine (mg/dl) | 0.91 ± 0.59                 | 0.90 ± 0.53            | 0.91 ± 0.63                | 0.90 ± 0.66              | 0.92           |
| Smoking                  | 1385 (31.7%)                | 565 (25.8%)            | 515 (36.9%)                | 305 (39.2%)              | <0.0001        |
| Family history of CAD    | 1517 (35.4%)                | 745 (35.0%)            | 510 (36.9%)                | 262 (34.2%)              | 0.37           |
| Clinical history         |                             |                        |                            |                          |                |
| Previous MI              | 807 (18.5%)                 | 427 (19.5%)            | 311 (22.3%)                | 69 (8.9%)                | <0.0001        |
| Previous PCI             | 693 (15.9%)                 | 514 (23.4%)            | 127 (9.1%)                 | 52 (6.7%)                | <0.0001        |

|                      |              |              |             |             |         |
|----------------------|--------------|--------------|-------------|-------------|---------|
| Previous CABG        | 196 (4.5%)   | 143 (6.5%)   | 43 (3.1%)   | 10 (1.3%)   | <0.0001 |
| Stent generation     |              |              |             |             | 0.32    |
| Early-generation DES | 1608 (36.8%) | 832 (37.9%)  | 498 (35.6%) | 278 (35.7%) |         |
| New-generation DES   | 2765 (63.2%) | 1365 (62.1%) | 899 (64.4%) | 501 (64.3%) |         |

---

### Angiographic Characteristics

---

|                                |               |               |               |               |         |
|--------------------------------|---------------|---------------|---------------|---------------|---------|
| Multivessel disease            | 1148 (30.5%)  | 591 (30.6%)   | 387 (30.4%)   | 170 (29.9%)   | 0.94    |
| Number of lesions treated      | 1.33 ± 0.66   | 1.27 ± 0.59   | 1.45 ± 0.76   | 1.29 ± 0.62   | <0.0001 |
| Number of DES implanted        | 1.58 ± 0.97   | 1.49 ± 0.88   | 1.72 ± 1.09   | 1.58 ± 0.94   | <0.0001 |
| Mean stent diameter (mm)       | 3.00 ± 0.39   | 3.00 ± 0.40   | 2.96 ± 0.39   | 3.10 ± 0.38   | <0.0001 |
| Total stent length (mm)        | 30.96 ± 20.48 | 28.98 ± 18.24 | 33.90 ± 23.56 | 31.96 ± 20.47 | <0.0001 |
| LVEF (%)                       | 52.45 ± 17.81 | 56.14 ± 16.84 | 47.58 ± 20.47 | 47.72 ± 11.58 | <0.0001 |
| Type B2/C lesion               | 2176 (65.2%)  | 1167 (62.7%)  | 674 (64.1%)   | 335 (78.8%)   | <0.0001 |
| Moderate/severe calcifications | 661 (24.0%)   | 370 (23.0%)   | 256 (28.4%)   | 35 (14.4%)    | <0.0001 |
| At least 1 bifurcation lesion  | 231 (14.9%)   | 157 (18.2%)   | 50 (12.2%)    | 24 (8.6%)     | <0.0001 |

---

Results reported as n (%) or mean ± standard deviation. BMI: Body Mass Index; DES: Drug-Eluting Stent; UA: Unstable Angina; NSTEMI: Non-ST segment Elevation Myocardial Infarction; STEMI: ST segment Elevation Myocardial Infarction;

---

CAD: Coronary Artery Disease; IDDM: Insulin-Dependent Diabetes Mellitus; MI: Myocardial Infarction; PCI: Percutaneous Coronary Intervention; CABG: Coronary Artery By-pass Graft.



## **eReferences**

1. Morice MC, Serruys PW, Sousa JE, et al. A randomized comparison of a sirolimus-eluting stent with a standard stent for coronary revascularization. *N Engl J Med*. Jun 6 2002;346(23):1773-1780.
2. Moses JW, Leon MB, Popma JJ, et al. Sirolimus-eluting stents versus standard stents in patients with stenosis in a native coronary artery. *N Engl J Med*. Oct 2 2003;349(14):1315-1323.
3. Schofer J, Schluter M, Gershlick AH, et al. Sirolimus-eluting stents for treatment of patients with long atherosclerotic lesions in small coronary arteries: double-blind, randomised controlled trial (E-SIRIUS). *Lancet*. Oct 4 2003;362(9390):1093-1099.
4. Schampaert E, Cohen EA, Schluter M, et al. The Canadian study of the sirolimus-eluting stent in the treatment of patients with long de novo lesions in small native coronary arteries (C-SIRIUS). *J Am Coll Cardiol*. Mar 17 2004;43(6):1110-1115.
5. Grube E, Silber S, Hauptmann KE, et al. TAXUS I: six- and twelve-month results from a randomized, double-blind trial on a slow-release paclitaxel-eluting stent for de novo coronary lesions. *Circulation*. Jan 7 2003;107(1):38-42.
6. Colombo A, Drzewiecki J, Banning A, et al. Randomized study to assess the effectiveness of slow- and moderate-release polymer-based paclitaxel-eluting stents for coronary artery lesions. *Circulation*. Aug 19 2003;108(7):788-794.
7. Stone GW, Ellis SG, Cox DA, et al. A polymer-based, paclitaxel-eluting stent in patients with coronary artery disease. *N Engl J Med*. Jan 15 2004;350(3):221-231.
8. Stone GW, Ellis SG, Cannon L, et al. Comparison of a polymer-based paclitaxel-eluting stent with a bare metal stent in patients with complex coronary artery disease: a randomized controlled trial. *Jama*. Sep 14 2005;294(10):1215-1223.
9. Windecker S, Remondino A, Eberli FR, et al. Sirolimus-eluting and paclitaxel-eluting stents for coronary revascularization. *N Engl J Med*. Aug 18 2005;353(7):653-662.
10. Fajadet J, Wijns W, Laarman GJ, et al. Randomized, double-blind, multicenter study of the Endeavor zotarolimus-eluting phosphorylcholine-encapsulated stent for treatment of native coronary artery lesions: clinical and angiographic results of the ENDEAVOR II trial. *Circulation*. Aug 22 2006;114(8):798-806.
11. Kandzari DE, Leon MB, Popma JJ, et al. Comparison of zotarolimus-eluting and sirolimus-eluting stents in patients with native coronary artery disease: a randomized controlled trial. *J Am Coll Cardiol*. Dec 19 2006;48(12):2440-2447.

12. Leon MB, Mauri L, Popma JJ, et al. A randomized comparison of the Endeavor zotarolimus-eluting stent versus the TAXUS paclitaxel-eluting stent in de novo native coronary lesions 12-month outcomes from the ENDEAVOR IV trial. *J Am Coll Cardiol.* Feb 9 2010;55(6):543-554.
13. Camenzind E, Wijns W, Mauri L, et al. Stent thrombosis and major clinical events at 3 years after zotarolimus-eluting or sirolimus-eluting coronary stent implantation: a randomised, multicentre, open-label, controlled trial. *Lancet.* Oct 20 2012;380(9851):1396-1405.
14. Serruys PW, Silber S, Garg S, et al. Comparison of zotarolimus-eluting and everolimus-eluting coronary stents. *N Engl J Med.* Jul 8 2010;363(2):136-146.
15. von Birgelen C, Basalus MW, Tandjung K, et al. A randomized controlled trial in second-generation zotarolimus-eluting Resolute stents versus everolimus-eluting Xience V stents in real-world patients: the TWENTE trial. *J Am Coll Cardiol.* Apr 10 2012;59(15):1350-1361.
16. Serruys PW, Ruygrok P, Neuzner J, et al. A randomised comparison of an everolimus-eluting coronary stent with a paclitaxel-eluting coronary stent:the SPIRIT II trial. *EuroIntervention.* Nov 2006;2(3):286-294.
17. Stone GW, Midei M, Newman W, et al. Comparison of an everolimus-eluting stent and a paclitaxel-eluting stent in patients with coronary artery disease: a randomized trial. *Jama.* Apr 23 2008;299(16):1903-1913.
18. Stone GW, Rizvi A, Newman W, et al. Everolimus-eluting versus paclitaxel-eluting stents in coronary artery disease. *N Engl J Med.* May 6 2010;362(18):1663-1674.
19. Kedhi E, Joesoef KS, McFadden E, et al. Second-generation everolimus-eluting and paclitaxel-eluting stents in real-life practice (COMPARE): a randomised trial. *Lancet.* Jan 16 2010;375(9710):201-209.
20. Kaiser C, Galatius S, Erne P, et al. Drug-eluting versus bare-metal stents in large coronary arteries. *N Engl J Med.* Dec 9 2010;363(24):2310-2319.
21. Park KW, Chae IH, Lim DS, et al. Everolimus-eluting versus sirolimus-eluting stents in patients undergoing percutaneous coronary intervention: the EXCELLENT (Efficacy of Xience/Promus Versus Cypher to Reduce Late Loss After Stenting) randomized trial. *J Am Coll Cardiol.* Oct 25 2011;58(18):1844-1854.
22. Kimura T, Morimoto T, Natsuaki M, et al. Comparison of everolimus-eluting and sirolimus-eluting coronary stents: 1-year outcomes from the Randomized Evaluation of

- Sirolimus-eluting Versus Everolimus-eluting stent Trial (RESET). *Circulation*. Sep 4 2012;126(10):1225-1236.
23. Valgimigli M, Campo G, Monti M, et al. Short- versus long-term duration of dual-antiplatelet therapy after coronary stenting: a randomized multicenter trial. *Circulation*. Apr 24 2012;125(16):2015-2026.
  24. Windecker S, Serruys PW, Wandel S, et al. Biolimus-eluting stent with biodegradable polymer versus sirolimus-eluting stent with durable polymer for coronary revascularisation (LEADERS): a randomised non-inferiority trial. *Lancet*. Sep 27 2008;372(9644):1163-1173.
  25. Smits PC, Hofma S, Togni M, et al. Abluminal biodegradable polymer biolimus-eluting stent versus durable polymer everolimus-eluting stent (COMPARE II): a randomised, controlled, non-inferiority trial. *Lancet*. Feb 23 2013;381(9867):651-660.
  26. Byrne RA, Kastrati A, Kufner S, et al. Randomized, non-inferiority trial of three limus agent-eluting stents with different polymer coatings: the Intracoronary Stenting and Angiographic Results: Test Efficacy of 3 Limus-Eluting Stents (ISAR-TEST-4) Trial. *Eur Heart J*. Oct 2009;30(20):2441-2449.

**eFigure 1.** Kaplan-Meier curves for death, myocardial infarction or target lesion revascularization (2A), death, myocardial infarction or stent thrombosis (2B), definite or probable stent thrombosis (2C) and target lesion revascularization (2D) in women presenting with unstable angina, non-ST-elevation myocardial infarction or ST-elevation myocardial infarction. NSTEMI: Non-ST Elevation Myocardial Infarction; STEMI: ST Elevation Myocardial Infarction; UA: Unstable Angina.

eFigure 1A.

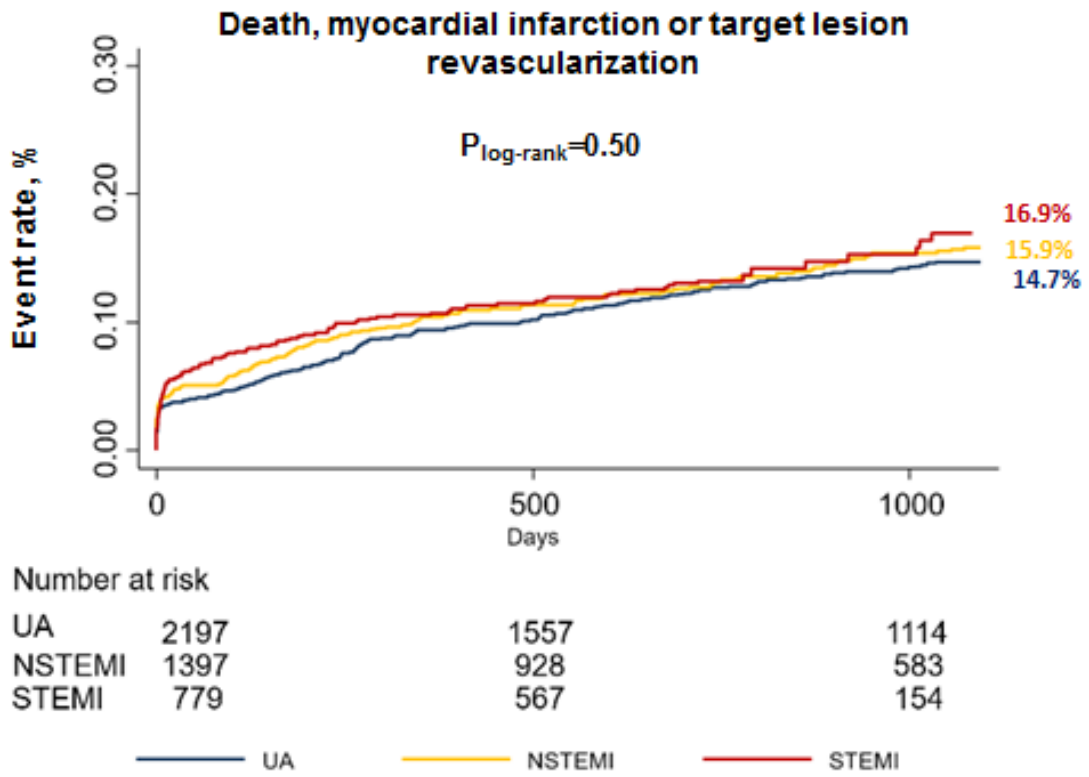

eFigure 1B.

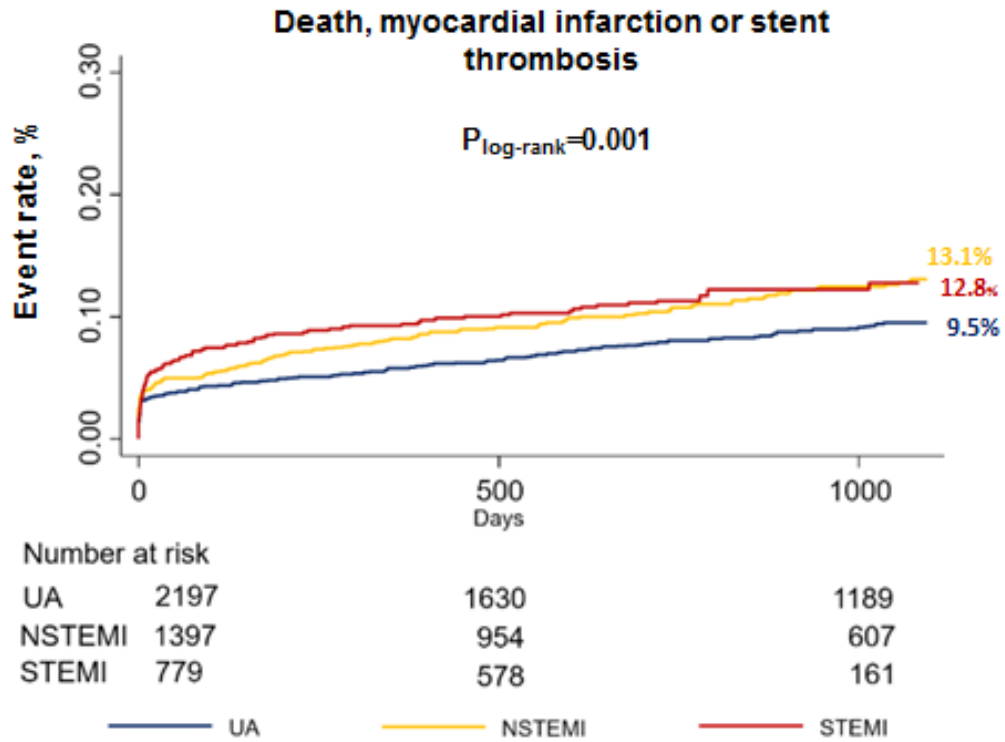

eFigure 1C.

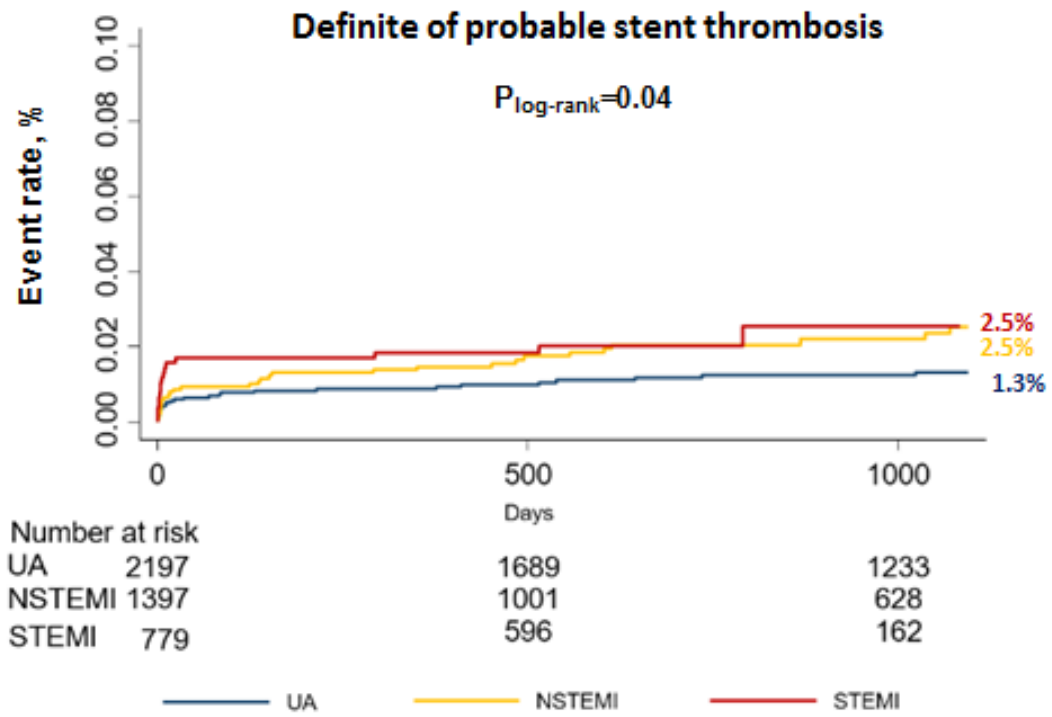

eFigure 1D.

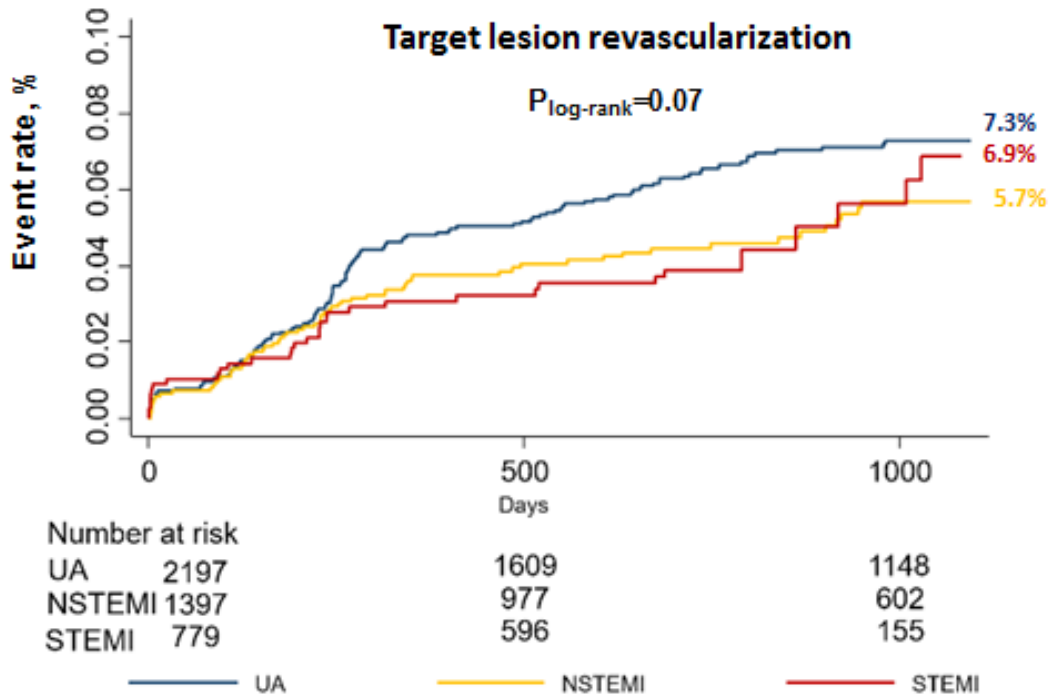

Supplement: jamacardiol-2-855-s001.pdf [file jamacardiol-2-855-s001.pdf]
